# Supplementary material
Source: PubMed Central journal article supplement (PMC4330574)
Supplement: supp_tpc.114.132506_tpc132506_Supplemental.pdf [file supp_tpc.114.132506_tpc132506_Supplemental.pdf]

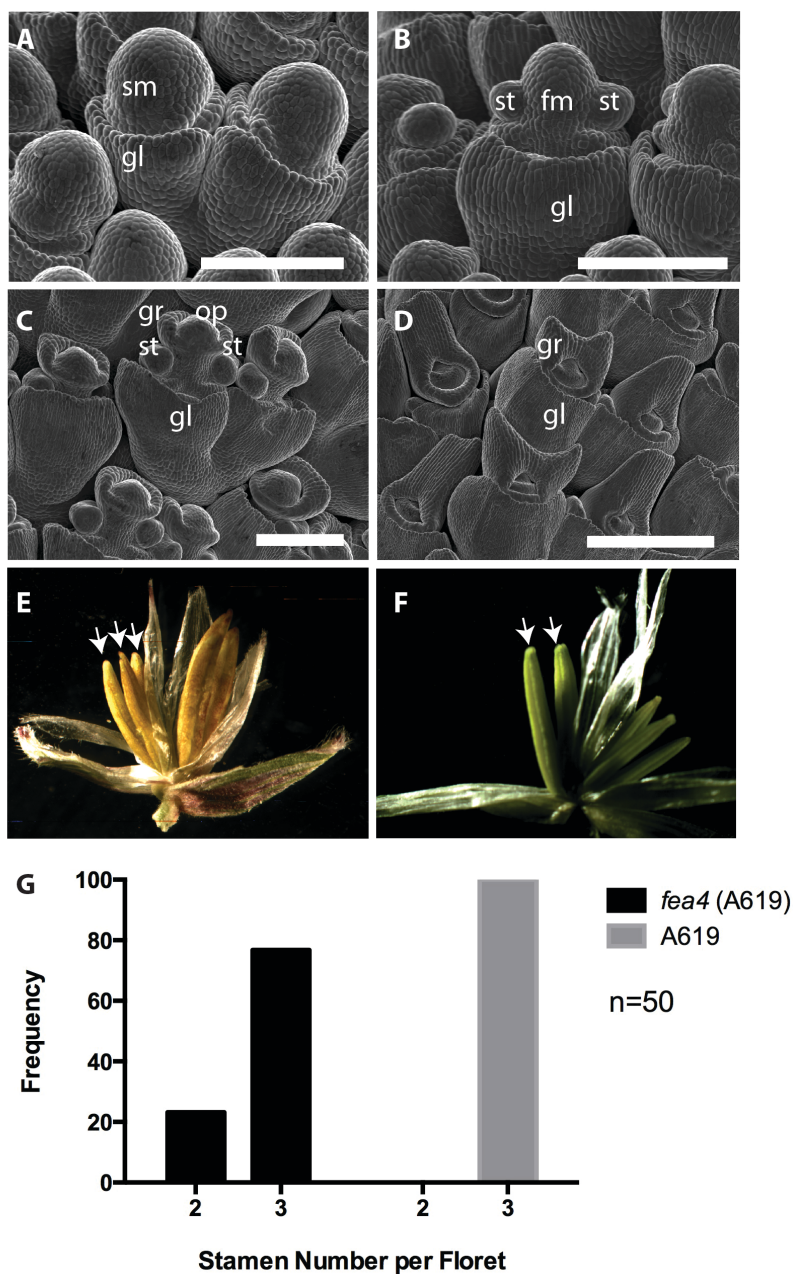

**Supplemental Figure 1:** *fea4* floral phenotypes. There is a normal progression of floral development in *fea4* mutants (A-D; wild type not shown). Wild type A619 male florets each contain 3 stamens (arrows, E), whereas florets of *fea4* plants introgressed into A619 frequently contain only 2 stamens (arrows, F), quantified in (G). sm= spikelet meristem; gl= glume; fm= floral meristem; st= stamen primordium; op= ovule primordium; gr= gynoecial ridge. Scale bars = 200  $\mu$ m in (A,B), 250  $\mu$ m in (C), and 500  $\mu$ m in (D) .

A.

```

PAN 1  MQSSFKTVFPTPDYSQSSYFFRGDSCLEEFHQPVNGPHHEBAIDLSPNVTIASANLHYT
FEA4 1  ---MHROFSPHAFSSSGSNAEQAGGYRHGRDGAT-LLPPELLQRSPNPSKSS--SAA

PAN 61  TFDTVMDCCGGGGGLRERLEGGEEELDTGQLVYQKGTRLVGGGVGEVNSSWCDSVSAH
FEA4 54  TVVPLAAAHGGGVAAPFGMAPLGVAAALEARFCMTPWS-----AAAHFENWCDSG-IV

PAN 121  ADSNSQHTDTSTDIPTDDKTQLNGGHQGMLLATNCSDQSNVKSSDORTLRRRLAONREAAARK
FEA4 107  VTSPLAETASTDVDMGGGGAMAQSVDC--HDNSLPAACKVEPRDHKAORRLAONREAAARK

PAN 181  SRLRKKAYVQOLENSRIRLAOLEEELKRARQOGLVERGVSAADHTLAAAGNCFVSELEY
FEA4 164  SRMRKKAYIVELENSRSKLSHLEOELORARQOQMFIAISGRSGDHGCSTG--CALAFDLEY

PAN 241  TRWKEBHQRMINDLRSGVNSQLGDNDRVLVDVAVMSHYDEIFRLKGIKTRKVDVFEMLSGM
FEA4 222  ARWLEBHQHMHNDLRVALSAQIGDDDLGVLVDGAMLHYDOMFRLKGVARTKVDVFEVLSGM

PAN 301  WKTFAERFFMNLGGFRSSELKILGNHVDPLTDQQLGIGICNLQOQSQOEDALSQGMFAL
FEA4 282  WMSFAERFFMNLGGFRSSELKVLARHVDPLTEQQLVIGICLQOQSQOEDALSQGMFAL

PAN 361  QOQLLETSSASMGFNSSANVADYMGHMAMGKLGTEENFLROADLLRQOQLQVRRIL
FEA4 342  QOALGDTAAAT-PCAADSVTNYMGOMAVMSKLAETVENFLROADLLRQOQLKQVRRIL

PAN 421  TTRQAARAFLVHIDYISRLRALSSLWLRPRD
FEA4 401  TTRQAARALVISDYFSRLRALSSLWLRPRD
    
```

B.

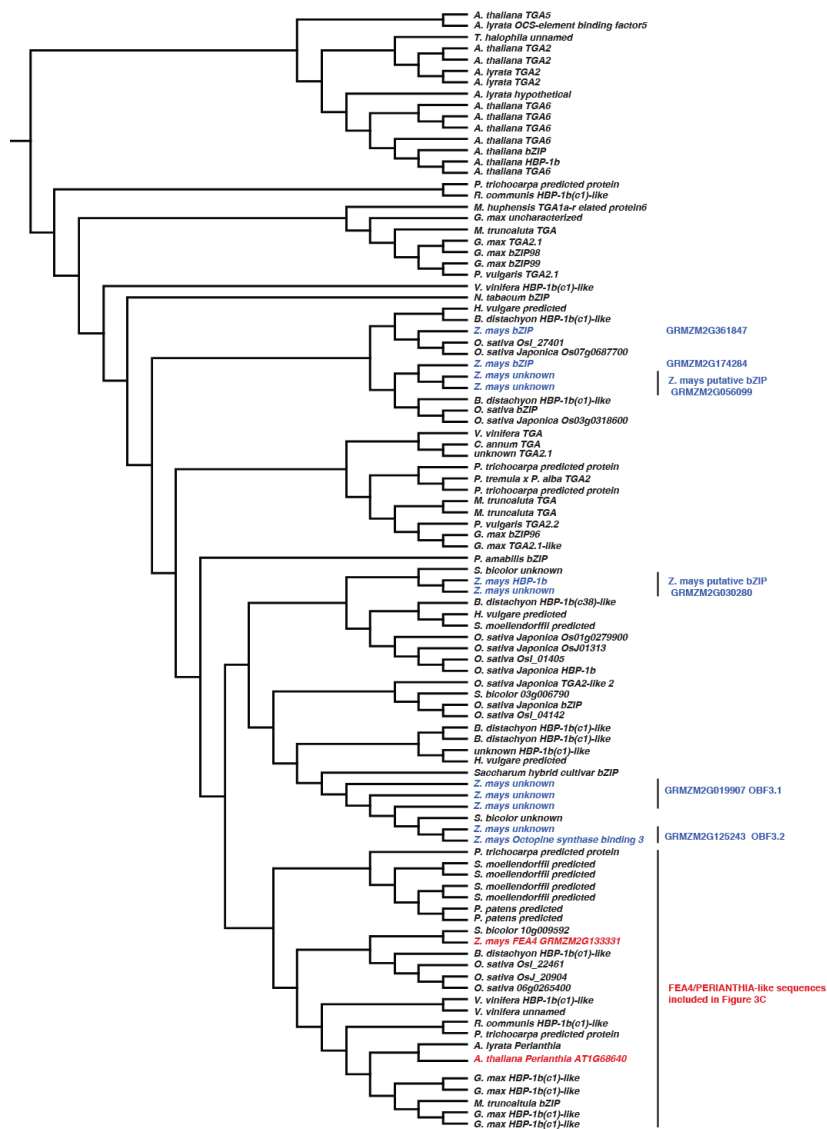

**Supplemental Figure 2:**

(A) A CLUSTAL alignment of FEA4 and PERIANTHIA visualized with the Boxshade program. Black boxes represent identical residues, grey boxes conservative substitutions, and white boxes non-conservative substitutions. FEA4 and PAN share approximately 59% identity.

(B) Phylogenetic tree of top 100 FEA4 BLAST hits; the clade shown in Fig. 3C is indicated. Red font used to indicate location of FEA4 and PERIANTHIA sequences. Blue font used to indicate location of other maize bZIP sequences.

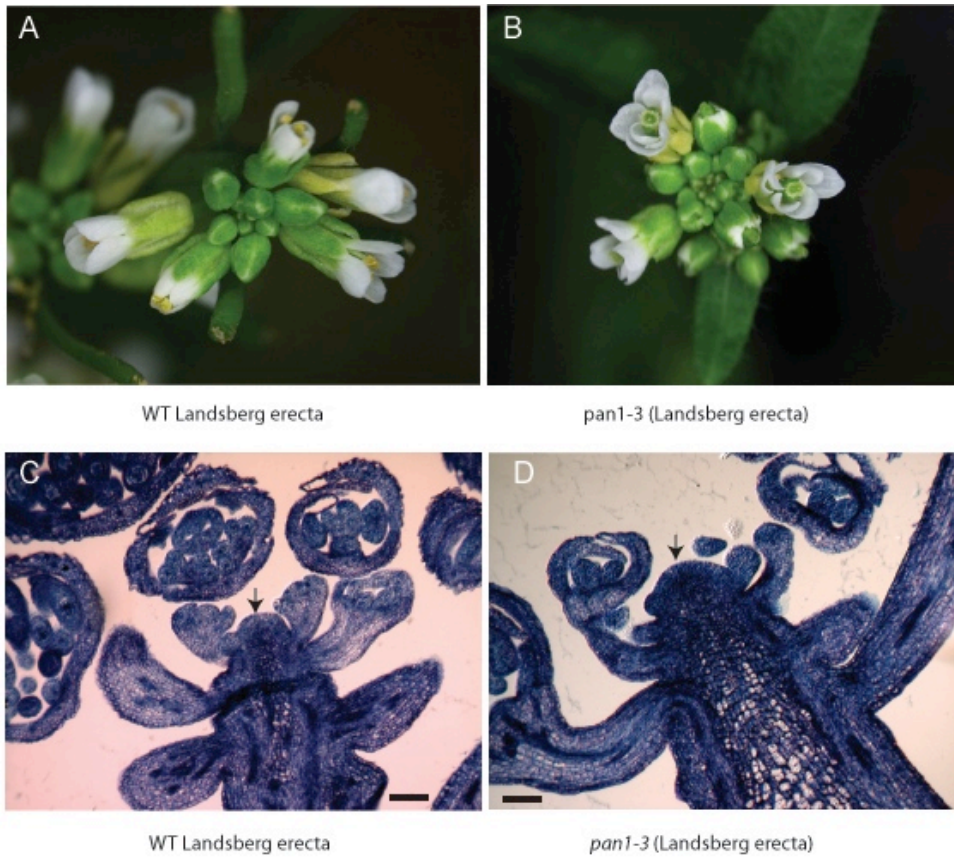

**Supplemental Figure 3:** Reproductive phenotypes of the *perianthia* (*pan*) mutant of *Arabidopsis*. Mutant flowers (B) have extra petals and sepals in the outer whorls compared to wild-type flowers (A) (Running et al., 1996). Mutant inflorescences also contain an increased number of flowers compared to the wild type, likely due to larger inflorescence meristems (C, D). *pan* meristems averaged 327  $\mu\text{m}$   $\pm$  29  $\mu\text{m}$  compared to 256  $\mu\text{m}$   $\pm$  35  $\mu\text{m}$  in wild type. Histological sections were stained with Toluidine Blue O. Scale bars = 100  $\mu\text{m}$  in C and D.

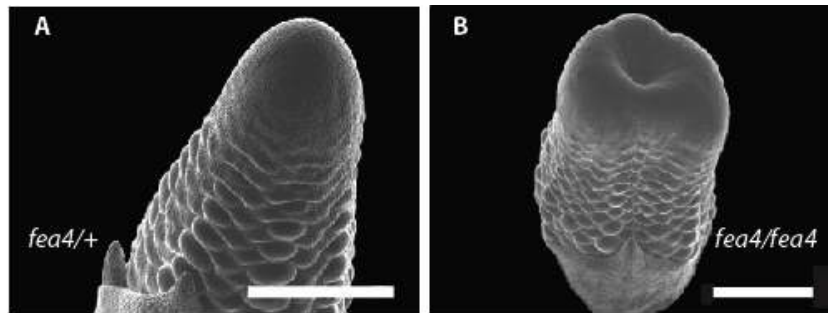

C

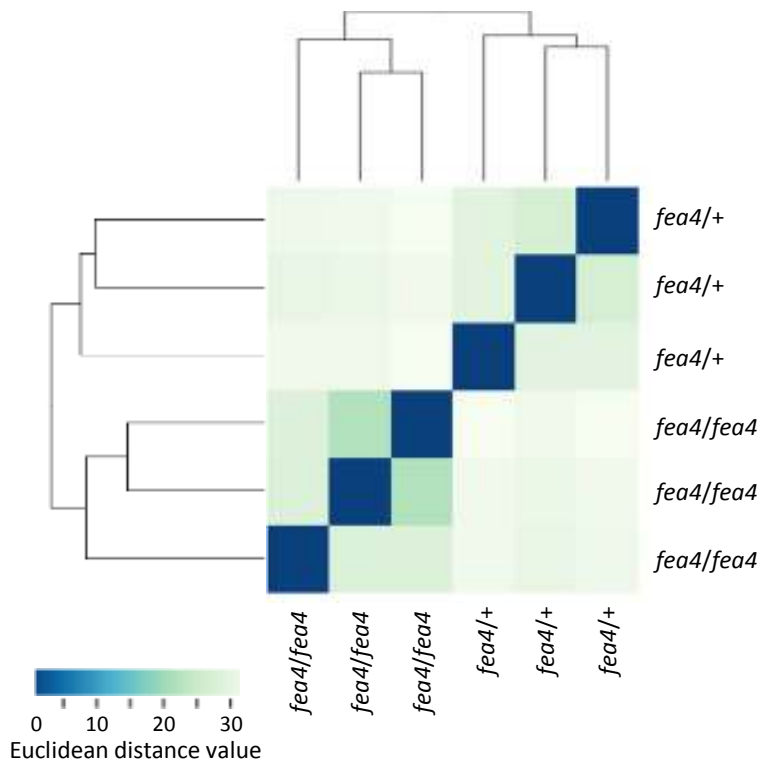

**Supplemental Figure 4.** Three biological replicates for *fea4/fea4* mutant and for *fea4/+* heterozygous “wild-type” siblings consisted of pools of >10 ~1-mm ear primordia. *fea4/fea4* ears have enlarged inflorescence meristems at this stage, but otherwise appear normal. Scale bars=500  $\mu$ m (A-B). Biological replicates for both *fea4/+* and *fea4/fea4* were closely correlated with each other. Heat map shows Euclidean distances between samples based on normalized gene expression data from DESeq analysis (C).

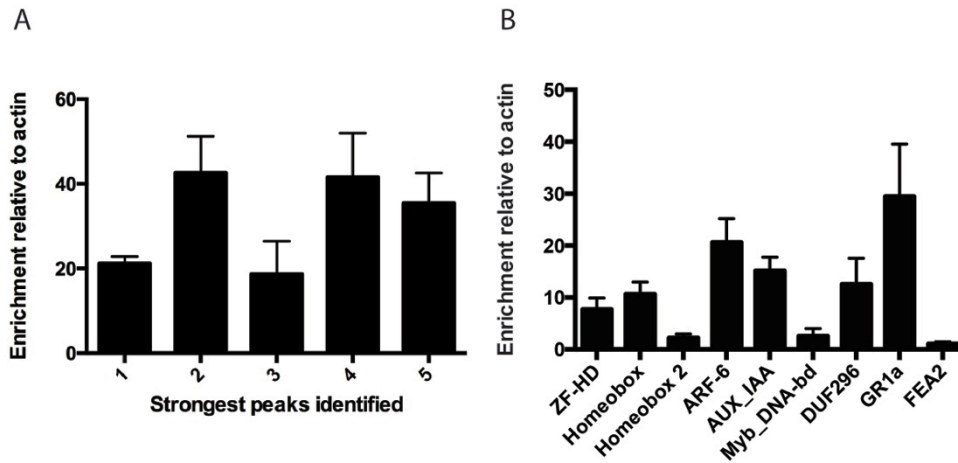

**Supplemental Figure 5:** qPCR validation of ChIP-seq peaks. Five strong peaks of FEA4 occupancy with high enrichment and low False Discovery Rate (FDR) were selected and validated (A). We also validated the enrichment of binding associated with bound and modulated targets (B). For validation, we performed three biologically replicated ChIP experiments, and each CT value used was the average of at least two technical replicates. Enrichment of bound regions relative to an actin control region was calculated by the delta CT method. The graphs represent the average enrichment +/- standard deviation. The *fea2* locus served as a negative control as no binding peaks were observed in the ChIP-seq experiments.

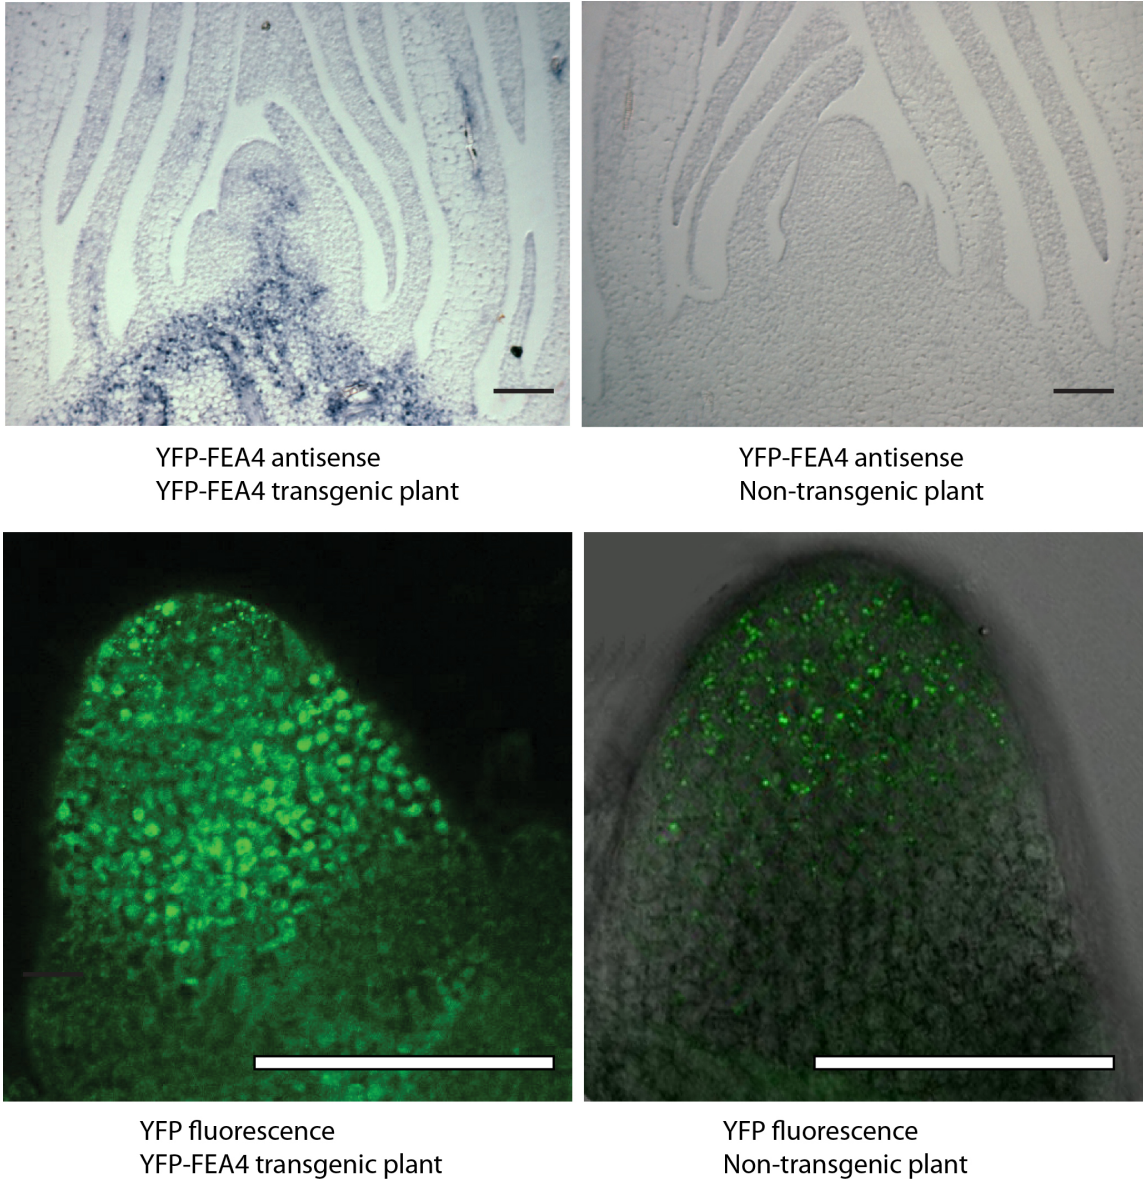

**Supplemental Figure 6:** YFP anti-sense *in situ* hybridization demonstrates concordance between mRNA and fusion protein accumulation. Apices from transgenic YFP-FEA4 plants and non-transgenic sibling plants were hybridized with a YFP anti-sense probe, which showed peripheral zone-specific expression in the transgenic plants, and no signal in the control. Scale bars = 100  $\mu$ m. YFP-FEA4 protein was visualized using a Zeiss 710 confocal microscope. Note that background, punctate fluorescence is observed in the apical region of the SAM.

**Supplemental Table 1: Summary of *fea4* mutant alleles.**

Seven independent alleles were obtained from various sources, including Ethyl Methane Sulfonate (EMS)-induced mutagenesis, and the Trait Utility System in Corn (TUSC) population.

| <b>Name</b>             | <b>Source</b> | <b>DNA</b> | <b>Protein</b> | <b>Complementation(F1)</b> | <b>Allelism(F2)</b> |
|-------------------------|---------------|------------|----------------|----------------------------|---------------------|
| <i>fea4-ref</i>         | EMS           | C-T        | W282→STOP      | N/A                        | N/A                 |
| <i>fea4-rel*09-5171</i> | EMS           | G-A        | Q242→STOP      | All fasciated, n=20        | All fasciated, n=40 |
| <i>fea4-rel*07-167</i>  | EMS           | G-A        | R307→R*        | All fasciated              | All fasciated n=20  |
| <i>fea4-369</i>         | EMS           | G-A        | G213→S         | All fasciated              |                     |
| <i>fea4-33</i>          | EMS           | C-T        | Q229→STOP      |                            |                     |
| <i>fea4-TUSC1</i>       | TUSC          | Mu         |                | Fasciated                  |                     |
| <i>fea4-TUSC2</i>       | TUSC          | Mu         |                | Fasciated                  |                     |

**\* This allele has a silent mutation. No other mutations were found in the coding region of this allele.**



**Supplemental Table 2. Summary statistics for RNA-sequencing and mapping.**

| Sample type                  | Biological Replicate | Mapped reads (101 bp) <sup>a</sup> | % mapped | % properly paired | Genes expressed (FPKM) <sup>b</sup> |        |
|------------------------------|----------------------|------------------------------------|----------|-------------------|-------------------------------------|--------|
|                              |                      |                                    |          |                   | ≥ 0.001                             | ≥ 1    |
| <i>fea4/+</i><br>(wild-type) | Rep. 1               | 39,148,856                         | 61.3     | 82.4              | 25,576                              | 21,170 |
|                              | Rep. 2               | 36,243,349                         | 64.2     | 82.2              |                                     |        |
|                              | Rep. 3               | 46,909,941                         | 64.1     | 81.4              |                                     |        |
| <i>fea4/fea4</i>             | Rep. 1               | 18,245,968                         | 67       | 81.6              | 26,232                              | 21,124 |
|                              | Rep. 2               | 44,380,258                         | 71.2     | 80.1              |                                     |        |
|                              | Rep. 3               | 63,213,521                         | 71.7     | 79.6              |                                     |        |

<sup>a</sup> 101-bp PE reads were mapped to the maize reference genome Refgen\_AGPv2 using *Tophat2* and an *a priori* set of 110,028 gene models (maize Working Gene Set).

<sup>b</sup> Based on a Filtered Gene Set (FGS) of 39,656 high-confidence models, *Cufflinks* was used to call expressed genes. Listed are numbers of FGS genes detected with FPKMs of at least 0.001 and 1, respectively.

**Supplemental Table 3: Gene expression analysis of meristem marker genes in *fea4* and wild type inflorescences.**

Normalized read count averages among all samples (baseMean.Avg), wild-type biological replicates (baseMean.wt) and *fea4* mutant biological replicates (baseMean.fea4) based on DESeq analysis. These values were used to determine fold changes. Genes are deemed significantly differentially expressed at an adjusted p-value of <0.05.

| Gene name       | Maize Gene ID | Significant | Adjusted p-value | baseMean Average | baseMean WT | baseMean <i>fea4</i> | Fold Change |
|-----------------|---------------|-------------|------------------|------------------|-------------|----------------------|-------------|
| <i>FEA4</i>     | GRMZM2G133331 | no          | 1                | 108.03           | 106.32      | 109.73               | 1.03        |
| <i>CT2</i>      | GRMZM2G064732 | no          | 0.5802           | 1475.85          | 1372.26     | 1579.44              | 1.15        |
| <i>KNI</i>      | GRMZM2G017087 | no          | 1                | 14962.85         | 14966.66    | 14959.05             | 1.00        |
| <i>FEA2</i>     | GRMZM2G104925 | no          | 0.6814           | 724.38           | 785.54      | 663.22               | 0.84        |
| <i>TD1</i>      | GRMZM2G300133 | no          | 0.3992           | 452.61           | 542.97      | 362.25               | 0.67        |
| <i>WUS1</i>     | GRMZM2G047448 | no          | 1                | 22.22            | 22.56       | 21.88                | 0.97        |
| <i>WUS2</i>     | GRMZM2G028622 | no          | 1                | 7.42             | 4.95        | 9.90                 | 2.00        |
| <i>WUS-like</i> | GRMZM2G069028 | no          | 1                | 18.26            | 17.37       | 19.14                | 1.10        |
| <i>WUS-like</i> | GRMZM2G108933 | no          | 0.3546           | 11.39            | 20.80       | 1.98                 | 0.10        |
| <i>WUS-like</i> | GRMZM2G069274 | no          | 1                | 262.82           | 270.02      | 255.63               | 0.95        |
| <i>WOX3A</i>    | GRMZM2G122537 | no          | 0.7541           | 593.33           | 678.20      | 508.46               | 0.75        |
| <i>WUS-like</i> | GRMZM2G409881 | no          | 0.9635           | 202.42           | 219.96      | 184.88               | 0.84        |
| <i>WUS-like</i> | GRMZM2G133972 | no          | 1                | 6.55             | 7.48        | 5.63                 | 0.75        |
| <i>WUS11</i>    | GRMZM2G170958 | no          | 0.9913           | 2.08             | 0.35        | 3.81                 | 10.88       |
| <i>CLV1like</i> | GRMZM2G123178 | no          | 1                | 139.09           | 142.86      | 135.32               | 0.95        |
| <i>CLV1like</i> | GRMZM2G066248 | no          | 1                | 139.09           | 142.86      | 135.32               | 0.95        |
| <i>ZmCLV3</i>   | GRMZM2G315601 | no          | N.A.             | 0.00             | 0.00        | 0.00                 | N.A.        |
| <i>ZmFCP1</i>   | GRMZM2G165836 | no          | 1                | 14.10            | 15.67       | 12.53                | 0.80        |

**Supplemental Table 4. ChIP-seq library sequencing and alignment summary statistics.**

|      |       | Reads sequenced | Reads aligned         | Suppressed alignments <sup>a</sup> | Reads post filter | Redundant rate <sup>b</sup> | Called peaks <sup>c</sup> |
|------|-------|-----------------|-----------------------|------------------------------------|-------------------|-----------------------------|---------------------------|
| rep1 | ChIP  | 3,208,913       | 1,187,974<br>(37.02%) | 1,326,255<br>(41.33%)              | 979,775           | 0.18                        | 5,020                     |
|      | Input | 3,045,051       | 1,155,697<br>(37.95%) | 1,525,800<br>(50.11%)              | 1,153,854         | 0                           |                           |
| rep2 | ChIP  | 4,890,975       | 1,657,898<br>(39.63%) | 1,693,350<br>(40.48%)              | 1,570,715         | 0.05                        | 9,644                     |
|      | Input | 4,346,850       | 1,408,355<br>(37.44%) | 1,887,325<br>(50.17%)              | 1,405,914         | 0                           |                           |

<sup>a</sup> Suppressed alignments due to multiple mapping reads; only unique alignments were kept. <sup>b</sup> Rate of tag redundancy in ChIP-seq libraries; only unique tags were used for peak-calling with MACS v1.0.4. <sup>c</sup> Significance threshold for calling enriched peaks was  $p < 1.0e-05$ .

**Supplemental Table 5: Primers used in this study.**

| Primer Name | Primer Sequence                                             | Purpose                            |
|-------------|-------------------------------------------------------------|------------------------------------|
| MP 510      | ACTGGATTCCTTGGGAAGGT                                        | CAPS marker for mapping            |
| MP 511      | TGGAGTGCACAATCCACAAT                                        | CAPS marker for mapping            |
| MP 516      | GCATCCACTTTAGCTTCTGGA                                       | CAPS marker for mapping            |
| MP 517      | CGACAACCTGGTTCTGTTACCAA                                     | CAPS marker for mapping            |
| MP 900      | TGATCCTGTGCAATGTAAAGC                                       | <i>fea4-ref</i> genotyping (Cac8I) |
| MP 901      | CAGCTGCTGCTCCGTCAG                                          | <i>fea4-ref</i> genotyping (Cac8I) |
| FEA2-D      | AACCTGCAGTCCCTGCCTCCA                                       | <i>fea2-o</i> genotyping           |
| FEA2-ASA    | AATAGGTCAGGTTCCCTATC                                        | <i>fea2-o</i> genotyping           |
| Mu58        | CCAWSGCCTCYATTTTCGT                                         | <i>fea2-o</i> genotyping           |
| MP 815      | ATGCATCGTCAGCCATCTC                                         | <i>fea4</i> full length probe      |
| MP 816      | TCAATCCGTCGGCCGCGTC                                         | <i>fea4</i> full length probe      |
| MP 833      | TCCCATTCGAAAACAAAAGC                                        | <i>fea4</i> short probe            |
| MP 834      | GAAGCTCCTGCTCAAGATGG                                        | <i>fea4</i> short probe            |
| MP 220      | GGGGACAAGTTTGTACAAAAAAGCAGG-<br>CTTCATAAATTTGATTTAGGGGGTGTT | YFP-FEA4 construction              |
| MP 201      | GGGGACAACTTTTGTATACAAAGTTGT-<br>CATCGGGCACGGATCAGAGCG       | YFP-FEA4 construction              |
| MP 202      | GGGGACAACTTTTCTATACAAAGTTGTC-<br>ATGCATCGTCAGCCATCTC        | YFP-FEA4 construction              |
| MP 203      | GGGGACAACTTTATTATACAAAGTTGT-<br>GCACCGAAATCGCTCTACTC        | YFP-FEA4 construction              |
| MP 204      | GGGGACAACTTTGTATAATAAAGTTGTC-<br>TCTGTATCCGTTGTGAGATGG      | YFP-FEA4 construction              |
| MP 205      | GGGGACCACTTTGTACAAGAAAGCTGGGT<br>A- GCGAAAGCAAACATTAATCA    | YFP-FEA4 construction              |
